# Supplementary material for: New routes for improving adhesion at the metal/α-Al2O3(0001) interface
Source: Royal Society of Chemistry journal article supplement (doi:10.1039/c5cp06435j), 2015-12-18
Supplement: c5cp06435j1.pdf [file c5cp06435j1.pdf]

Supplementary Information

**New routes for improving adhesion at metal/ $\alpha$ -Al<sub>2</sub>O<sub>3</sub>(0001) interface**

*Rémi Cavallotti, Ha-Linh Thi Le, Jacek Goniakowski, Rémi Lazzari, Jacques Jupille, Alexey Koltsov, and Didier Loison*

1. Structural information on metal M = Cr, Ni, Ag, and Zn adatoms adsorbed on bare (3O) and (Al) terminations [(3O)M<sub>y</sub> and (Al)+M, respectively], and on hydroxylated (Al) termination [(Al)OHM<sub>y</sub>], as obtained from VASP calculations at the LDA level, Fig. 5.

**(3O)Cr**

4.697352000000000

|                    |                    |                    |
|--------------------|--------------------|--------------------|
| 1.0000000000000000 | 0.0000000000000000 | 0.0000000000000000 |
| 0.5000000000000000 | 0.8660254030004244 | 0.0000000000000000 |
| 0.0000000000000000 | 0.0000000000000000 | 4.3980452500000000 |

Al O Cr

10 18 2

Selective dynamics

Direct

|                    |                    |                    |   |   |   |
|--------------------|--------------------|--------------------|---|---|---|
| 0.3391003514708331 | 0.6840446782289078 | 0.1877375788380959 | T | T | T |
| 0.0058102037260070 | 0.3506640883756944 | 0.2011522798011285 | T | T | T |
| 0.6725916116500343 | 0.0171657808598411 | 0.2885976716790921 | T | T | T |
| 0.3393893417933356 | 0.6837155877471162 | 0.3121401947007030 | T | T | T |
| 0.0061983510573071 | 0.3502796786417264 | 0.3930240017248607 | T | T | T |
| 0.6729877883638835 | 0.0168714353047861 | 0.4163041100917013 | T | T | T |
| 0.3397676469648303 | 0.6834641931662873 | 0.4972064980099518 | T | T | T |
| 0.0065254065158271 | 0.3501051707353113 | 0.5207344156165590 | T | T | T |
| 0.6732884048486270 | 0.0167456233628442 | 0.6081934918659968 | T | T | T |
| 0.3399872942163427 | 0.6834168936402705 | 0.6216012019992974 | T | T | T |
| 0.0246853911265958 | 0.0287082844411159 | 0.1427152046606324 | T | T | T |
| 0.3088829214015973 | 0.3696633099591509 | 0.1427056271324645 | T | T | T |
| 0.6837341953896399 | 0.6539150282648762 | 0.1427261671289415 | T | T | T |
| 0.3365112583201579 | 0.9948471720346390 | 0.2476616845802937 | T | T | T |
| 0.6501001239558164 | 0.3756447170845476 | 0.2476520698684368 | T | T | T |
| 0.0309749717324976 | 0.6812477876541720 | 0.2476572881571428 | T | T | T |
| 0.9791112426173285 | 0.0164079658885044 | 0.3524704189421399 | T | T | T |
| 0.3670803625044456 | 0.3233471569733197 | 0.3524711696035538 | T | T | T |
| 0.6722074373523128 | 0.7112620782783381 | 0.3524656909179882 | T | T | T |
| 0.3120956381497706 | 0.0438371279971719 | 0.4568636668302304 | T | T | T |
| 0.7000737502436749 | 0.3507654016887116 | 0.4568667030147964 | T | T | T |
| 0.0070015541224322 | 0.6558943301547373 | 0.4568610875404602 | T | T | T |
| 0.0290075525025344 | 0.9916745890421197 | 0.5616859207818834 | T | T | T |
| 0.3425361825491606 | 0.3725387120954338 | 0.5616862055922738 | T | T | T |
| 0.6481557974911567 | 0.6860876298316114 | 0.5616859198260684 | T | T | T |
| 0.3702274640222782 | 0.9978056751945559 | 0.6666278385243274 | T | T | T |
| 0.6543827968768454 | 0.3387938295993962 | 0.6666250375496290 | T | T | T |
| 0.9953689207466141 | 0.7136666271249794 | 0.6666317941869693 | T | T | T |

0.6724149263866650 0.0174231426861837 0.1161878053268239 T T T  
0.0066547218216684 0.3500913221231272 0.6931400351258787 T T T

**(Al)+Cr**

4.69735200000000  
1.0000000000000000 0.0000000000000000 0.0000000000000000  
0.5000000000000000 0.8660254030004244 0.0000000000000000  
0.0000000000000000 0.0000000000000000 4.3980452500000000

Al O Cr  
12 18 2

Selective dynamics

Direct

0.0164171495555632 0.3291585264456706 0.1754355217056089 T T T  
0.6828979177338570 0.9960061101049928 0.2551528884201577 T T T  
0.3494432258689970 0.6627083073537431 0.2747746641879963 T T T  
0.0160925636202001 0.3293468239766134 0.3585325215751083 T T T  
0.6827632835154165 0.9960097653311735 0.3816135459492386 T T T  
0.3495088202237132 0.6626619165460866 0.4630797859669442 T T T  
0.0162031223596418 0.3293191596744567 0.4860942047480156 T T T  
0.6828897597045560 0.9960080881641403 0.5675563304455997 T T T  
0.3496041673457325 0.6626894528424517 0.5906450481038650 T T T  
0.0162921549324562 0.3293716141371053 0.6743947681950677 T T T  
0.6830457567368114 0.9960132957834084 0.6940210465895497 T T T  
0.3497990122968963 0.6625997197180605 0.7737394940949820 T T T  
0.0349381384169420 0.9727319042153368 0.2132457197916669 T T T  
0.3541889945177747 0.3479049225951949 0.2132340649486960 T T T  
0.6598798838992522 0.6670666847428132 0.2132831069704058 T T T  
0.3758254231214587 0.9949778531076360 0.3176207390511019 T T T  
0.6816755049308523 0.3040239842948010 0.3176297520176018 T T T  
0.9907850903974326 0.6890706844450052 0.3176235804679882 T T T  
0.0159474440279540 0.0231973873693234 0.4223243634683370 T T T  
0.3224778973269609 0.3291253716914002 0.4223314951636932 T T T  
0.7100250968878619 0.6356596028458518 0.4223231417858359 T T T  
0.3497623270957959 0.9687816898506786 0.5268444933828074 T T T  
0.6556798471186207 0.3563567654288984 0.5268478517092362 T T T  
0.0432346865142667 0.6628623573770825 0.5268467687996702 T T T  
0.9898615243930258 0.9971295535628867 0.6315412855021529 T T T  
0.3749440028759860 0.3029417111234255 0.6315452902728461 T T T  
0.6840306690417643 0.6880158111115268 0.6315485471829489 T T T  
0.3310966777643720 0.0191051603820140 0.7359081741587310 T T T  
0.7062618099164157 0.3247581993291805 0.7359371088770861 T T T  
0.0118952670795769 0.6440084163847611 0.7359132151246268 T T T  
0.3506875231048348 0.6623428019184822 0.1417166643287843 T T T  
0.0170738371583705 0.3290618331585813 0.8074582192537736 T T T

**(Al)OHCr**

4.69735200000000  
1.0000000000000000 0.0000000000000000 0.0000000000000000  
0.5000000000000000 0.8660254030004244 0.0000000000000000

0.0000000000000000 0.0000000000000000 4.3980452500000000

Al O H Cr

12 20 2 2

Selective dynamics

Direct

|                     |                    |                    |   |   |   |
|---------------------|--------------------|--------------------|---|---|---|
| 0.0226934159324451  | 0.3598051252550051 | 0.2314687371791108 | T | T | T |
| 0.6862965532661452  | 0.0332034566607382 | 0.3047992729266224 | T | T | T |
| 0.3538835981572810  | 0.7007319009554821 | 0.3227088773261752 | T | T | T |
| 0.0196920654424149  | 0.3665421908608560 | 0.4078774795454491 | T | T | T |
| 0.6868450487054893  | 0.0330605051470989 | 0.4308046454766122 | T | T | T |
| 0.3536532495597096  | 0.6994035551675257 | 0.5122507105734780 | T | T | T |
| 0.0201548074470549  | 0.3663830712360039 | 0.5354644241679963 | T | T | T |
| 0.6870116857681056  | 0.0330457956128061 | 0.6169146795159082 | T | T | T |
| 0.3534095112708637  | 0.7003793324941632 | 0.6398379347639329 | T | T | T |
| 0.0220294023838116  | 0.3661746399966067 | 0.7250034387823554 | T | T | T |
| 0.6871113004120599  | 0.0337518890667273 | 0.7429166177154931 | T | T | T |
| 0.3503880546856621  | 0.6970765374192617 | 0.8162755770868223 | T | T | T |
| 0.1207268965209419  | 0.1747918352152104 | 0.1530650958085508 | T | T | T |
| 0.0368401629196995  | 0.0132785895190699 | 0.2662733495687935 | T | T | T |
| 0.3661003670147692  | 0.3850283981928723 | 0.2593197098037269 | T | T | T |
| 0.6680971727960646  | 0.7069257030708712 | 0.2609327002973291 | T | T | T |
| 0.3807049774800407  | 0.0330117753872717 | 0.3663497526508905 | T | T | T |
| 0.6821552091556884  | 0.3443958330358235 | 0.3670093361235859 | T | T | T |
| 0.9966315972427763  | 0.7236088572699482 | 0.3668462315806376 | T | T | T |
| 0.0201372448719385  | 0.0600480881386967 | 0.4713949615441553 | T | T | T |
| 0.3263535906293287  | 0.3654887530112015 | 0.4717009041887896 | T | T | T |
| 0.7139172708616999  | 0.6731051292860893 | 0.4716239935308380 | T | T | T |
| 0.3538383846273232  | 0.0059977540321183 | 0.5761388883841395 | T | T | T |
| 0.6591414352608815  | 0.3932181415514901 | 0.5759796648860780 | T | T | T |
| 0.0473436626723075  | 0.6999003483045582 | 0.5763303762022848 | T | T | T |
| 0.9938217676288801  | 0.0378986814311810 | 0.6807189203878111 | T | T | T |
| 0.3809950603397378  | 0.3393884829703733 | 0.6813704973199903 | T | T | T |
| 0.6875636180222178  | 0.7234325943968501 | 0.6808636771659939 | T | T | T |
| 0.3427493910714549  | 0.0517912822132782 | 0.7867872824079281 | T | T | T |
| 0.7189447479728501  | 0.3539414773253540 | 0.7883494577244358 | T | T | T |
| 0.0177241303280716  | 0.6832742420273988 | 0.7814906126167410 | T | T | T |
| 0.2656963574489395  | 0.5965984109702970 | 0.8946745503234103 | T | T | T |
| 0.1720927985850412  | 0.2721086846888809 | 0.1159883056696140 | T | T | T |
| 0.4180610195361792  | 0.5408485915820841 | 0.9312841346505244 | T | T | T |
| 0.3227504160158385  | 0.7076348268811691 | 0.1852802955433231 | T | T | T |
| -0.0011675057429212 | 0.3965350245497228 | 0.8623774680740731 | T | T | T |

**(30)Ni\_1.5**

4.697352000000000

2.0000000000000000 0.0000000000000000 0.0000000000000000

0.5000000000000000 0.8660254030004244 0.0000000000000000

0.0000000000000000 0.0000000000000000 4.3980452500000000

Al O Ni

## Selective dynamics

## Direct

|                    |                     |                    |   |   |   |
|--------------------|---------------------|--------------------|---|---|---|
| 0.3309173263810789 | 0.9804845656023603  | 0.2006436636388758 | T | T | T |
| 0.8462303284698640 | 0.0208634823375605  | 0.2100333629516143 | T | T | T |
| 0.1618189905822418 | 0.6541420346934234  | 0.2333666241154740 | T | T | T |
| 0.6602073089025220 | 0.7068236937104646  | 0.2190034770049447 | T | T | T |
| 0.0014266751672303 | 0.3326118353111241  | 0.3116994750203164 | T | T | T |
| 0.5005977074614059 | 0.3407155328986004  | 0.3087623514160126 | T | T | T |
| 0.3372493874511817 | -0.0001958993046068 | 0.3311458606974363 | T | T | T |
| 0.8305129171045784 | 0.0076624165794482  | 0.3347125035585594 | T | T | T |
| 0.1687520117090855 | 0.6669665939863706  | 0.4150833806144323 | T | T | T |
| 0.6668985370202357 | 0.6731403217463471  | 0.4142521671221288 | T | T | T |
| 0.0017186800237264 | 0.3341401713562684  | 0.4381360168582181 | T | T | T |
| 0.4998542920661908 | 0.3403176782656183  | 0.4373010850516820 | T | T | T |
| 0.3313694572848984 | 0.0074846907240548  | 0.5212504642801021 | T | T | T |
| 0.8380870670641455 | 0.9996587880890409  | 0.5176719810364449 | T | T | T |
| 0.1680163622395699 | 0.6665996020328310  | 0.5436251936749567 | T | T | T |
| 0.6671952218632071 | 0.6746949352378478  | 0.5406939104320340 | T | T | T |
| 0.0084298964146871 | 0.3004938583450347  | 0.6333945320250629 | T | T | T |
| 0.5068097167739408 | 0.3531864442854667  | 0.6190259551874255 | T | T | T |
| 0.3377046193126697 | 0.0268719188014246  | 0.6517591502374929 | T | T | T |
| 0.8224056927668086 | 0.9864581214982777  | 0.6423485836010919 | T | T | T |
| 0.0398521536961145 | 0.9331277904571200  | 0.1656625574260096 | T | T | T |
| 0.4935988124651923 | 0.9939874905955994  | 0.1632945855837233 | T | T | T |
| 0.1470411073147130 | 0.3353477244332901  | 0.1650613928084177 | T | T | T |
| 0.7292699853997402 | 0.3745286325295086  | 0.1586191943071153 | T | T | T |
| 0.3829356124774113 | 0.6205657077837702  | 0.1472861561853143 | T | T | T |
| 0.7878224517831424 | 0.8051340061130758  | 0.1578502250136524 | T | T | T |
| 0.1845293859565236 | 0.9874780598803919  | 0.2687189656218852 | T | T | T |
| 0.6805961906470475 | 0.0134906738801571  | 0.2695630154106389 | T | T | T |
| 0.3322715333625204 | 0.3101377749688894  | 0.2689353107531500 | T | T | T |
| 0.8353513911356126 | 0.3212695928011893  | 0.2705549996862923 | T | T | T |
| 0.9835270234308815 | 0.6982499593359036  | 0.2716550238686549 | T | T | T |
| 0.4896779796590934 | 0.6935320411881227  | 0.2660383726232702 | T | T | T |
| 0.0013597331187333 | 0.0280025087160207  | 0.3742846909667873 | T | T | T |
| 0.5008248090819760 | 0.0315926366190414  | 0.3731676030704295 | T | T | T |
| 0.1556492757097821 | 0.3324522018646272  | 0.3731790903860999 | T | T | T |
| 0.6519918773087003 | 0.3417764530208010  | 0.3742777886556352 | T | T | T |
| 0.3479526245234448 | 0.6437677413710911  | 0.3734919539754560 | T | T | T |
| 0.8483053244184002 | 0.6441449097870267  | 0.3749997062090231 | T | T | T |
| 0.1677853199927467 | 0.9757077996613464  | 0.4792289211473218 | T | T | T |
| 0.6672421389068752 | 0.9793196201235465  | 0.4781024540241021 | T | T | T |
| 0.3206619175042190 | 0.3635220974093586  | 0.4789012938992910 | T | T | T |
| 0.8203172256339943 | 0.3631407326802031  | 0.4773866559370640 | T | T | T |
| 0.0166133193120773 | 0.6655398240826585  | 0.4781064199900354 | T | T | T |
| 0.5129779108898826 | 0.6748058542157436  | 0.4792169097178673 | T | T | T |
| 0.9880217846399553 | 0.9938507733998768  | 0.5828290649202915 | T | T | T |
| 0.4841073185150465 | 0.0198161680301632  | 0.5836802955685702 | T | T | T |

|                    |                    |                    |   |   |   |
|--------------------|--------------------|--------------------|---|---|---|
| 0.1789591937774689 | 0.3137935818670437 | 0.5863633991762475 | T | T | T |
| 0.6850954197864320 | 0.3090821413535807 | 0.5807330917484002 | T | T | T |
| 0.3363390642109226 | 0.6971945357339265 | 0.5834674627856947 | T | T | T |
| 0.8332839514972302 | 0.6860606124963374 | 0.5818266744349478 | T | T | T |
| 0.1750250823652088 | 0.0133653154329000 | 0.6891045595572934 | T | T | T |
| 0.6287666897602169 | 0.0742878668840407 | 0.6867313172160585 | T | T | T |
| 0.2856838831324103 | 0.3867608030851361 | 0.7051357097889188 | T | T | T |
| 0.8807980686700168 | 0.2022282138410531 | 0.6945386239674742 | T | T | T |
| 0.9393391827783002 | 0.6328403331565202 | 0.6937731028537352 | T | T | T |
| 0.5215928791675905 | 0.6720298866205874 | 0.6873391160694782 | T | T | T |
| 0.9387608125955657 | 0.3687373144929302 | 0.1471011024127935 | T | T | T |
| 0.5834859692849815 | 0.2305875160102323 | 0.1411549328499738 | T | T | T |
| 0.2160895647400035 | 0.5767479211692423 | 0.1182292655970047 | T | T | T |
| 0.0851463684324662 | 0.7767649159125366 | 0.7112357176146922 | T | T | T |
| 0.7298546962110828 | 0.6386627426894537 | 0.7052755555185830 | T | T | T |
| 0.4525155417778698 | 0.4306893506916263 | 0.7341655661674081 | T | T | T |

**(Al)+Ni**

4.69735200000000

|                    |                    |                    |
|--------------------|--------------------|--------------------|
| 1.0000000000000000 | 0.0000000000000000 | 0.0000000000000000 |
| 0.5000000000000000 | 0.8660254030004244 | 0.0000000000000000 |
| 0.0000000000000000 | 0.0000000000000000 | 4.3980452500000000 |

Al O Ni

12 18 2

**Selective dynamics**

**Direct**

|                    |                    |                    |   |   |   |
|--------------------|--------------------|--------------------|---|---|---|
| 0.0154752854881863 | 0.3300183074005716 | 0.1787125196352264 | T | T | T |
| 0.6832190007463197 | 0.9956802652003987 | 0.2553617640486792 | T | T | T |
| 0.3497930102961888 | 0.6628487907563354 | 0.2739785771375196 | T | T | T |
| 0.0163586075488240 | 0.3293670538087028 | 0.3585338835856859 | T | T | T |
| 0.6830122596171506 | 0.9960536122622656 | 0.3816040975937582 | T | T | T |
| 0.3496520860509875 | 0.6626931548589567 | 0.4630357254825839 | T | T | T |
| 0.0162682553643947 | 0.3293699086613984 | 0.4861362920671723 | T | T | T |
| 0.6828582031898591 | 0.9960509990097108 | 0.5675628278047569 | T | T | T |
| 0.3495098656816111 | 0.6627756363187558 | 0.5906438214113265 | T | T | T |
| 0.0159880696754442 | 0.3294768132662256 | 0.6751967862505381 | T | T | T |
| 0.6827326262002842 | 0.9964525677612883 | 0.6938101074656586 | T | T | T |
| 0.3499654169677413 | 0.6621777225999068 | 0.7704600272029722 | T | T | T |
| 0.0317417537196150 | 0.9758380695427888 | 0.2132841116878765 | T | T | T |
| 0.3538681465078000 | 0.3445940751863930 | 0.2135922409122983 | T | T | T |
| 0.6621653925499231 | 0.6675469846273430 | 0.2134090871027894 | T | T | T |
| 0.3760376395926031 | 0.9944872727680121 | 0.3175723714935330 | T | T | T |
| 0.6815686801883558 | 0.3044982753931009 | 0.3175434409264923 | T | T | T |
| 0.9916304735766914 | 0.6890572609770018 | 0.3175485229852342 | T | T | T |
| 0.0160562608911263 | 0.0233136930981104 | 0.4223142311700485 | T | T | T |
| 0.3226772790679604 | 0.3290786188278574 | 0.4223120492629207 | T | T | T |
| 0.7102961794418405 | 0.6356854116430313 | 0.4223063561989804 | T | T | T |
| 0.3498620013555964 | 0.9687545157344388 | 0.5268557930873285 | T | T | T |
| 0.6556186341504429 | 0.3564056420068695 | 0.5268663788197756 | T | T | T |

|                    |                    |                    |   |   |   |
|--------------------|--------------------|--------------------|---|---|---|
| 0.0432507845100218 | 0.6630006646903084 | 0.5268650323769606 | T | T | T |
| 0.9897991985510046 | 0.9977335537336529 | 0.6316033272842674 | T | T | T |
| 0.3742404713479317 | 0.3030936870893370 | 0.6316230299056258 | T | T | T |
| 0.6843066504659205 | 0.6876597134365312 | 0.6316184269101655 | T | T | T |
| 0.3341641434070723 | 0.0160921297354122 | 0.7358140161334248 | T | T | T |
| 0.7035688609394271 | 0.3246545842128654 | 0.7358134320598850 | T | T | T |
| 0.0117954462448466 | 0.6474177150606906 | 0.7356047269587691 | T | T | T |
| 0.3481478787639531 | 0.6577215284280840 | 0.1465368665974722 | T | T | T |
| 0.0196000173842563 | 0.3314172469164376 | 0.8026435306803847 | T | T | T |

**(Al)OHNi\_0.5**

4.69735200000000

|                    |                    |                    |
|--------------------|--------------------|--------------------|
| 2.0000000000000000 | 0.0000000000000000 | 0.0000000000000000 |
| 0.5000000000000000 | 0.8660254030004244 | 0.0000000000000000 |
| 0.0000000000000000 | 0.0000000000000000 | 4.3980452500000000 |

Al O H Ni

24 40 4 2

Selective dynamics

Direct

|                    |                    |                    |   |   |   |
|--------------------|--------------------|--------------------|---|---|---|
| 0.0044140706328014 | 0.3357587155983474 | 0.2342322991783392 | T | T | T |
| 0.5024771731415127 | 0.3364048995384959 | 0.2341563579600023 | T | T | T |
| 0.3382005205930239 | 0.0148178045986394 | 0.3058986220300036 | T | T | T |
| 0.8326501353867490 | 0.0042014517547196 | 0.3037539473107724 | T | T | T |
| 0.1676905901465161 | 0.6788875278631372 | 0.3266150871676946 | T | T | T |
| 0.6698094295651680 | 0.6688820799732687 | 0.3145376740128881 | T | T | T |
| 0.9986106470079170 | 0.3431861989764589 | 0.4078418243760854 | T | T | T |
| 0.5048673433744354 | 0.3386020409931804 | 0.4065951776369426 | T | T | T |
| 0.3354025942918656 | 0.0078035049068895 | 0.4311190119630924 | T | T | T |
| 0.8345005406632041 | 0.0069554250810022 | 0.4293457450515744 | T | T | T |
| 0.1680626498885846 | 0.6752128640282188 | 0.5118657121637578 | T | T | T |
| 0.6683885517258166 | 0.6733679223816468 | 0.5112309927291915 | T | T | T |
| 0.0014504294341333 | 0.3419822688275835 | 0.5350961026942561 | T | T | T |
| 0.5017749201032761 | 0.3401349925162418 | 0.5344654278498273 | T | T | T |
| 0.3344328580543918 | 0.0075461355629696 | 0.6152151852093741 | T | T | T |
| 0.8353419330073791 | 0.0083685138073147 | 0.6169840411078062 | T | T | T |
| 0.1649864942523724 | 0.6767267978116300 | 0.6397322304585248 | T | T | T |
| 0.6712294751049800 | 0.6721408200175107 | 0.6384768691472346 | T | T | T |
| 0.0000577092274858 | 0.3464456505380878 | 0.7317909311921365 | T | T | T |
| 0.5021709126386791 | 0.3363982991733146 | 0.7197136615675898 | T | T | T |
| 0.3316787964490728 | 0.0004660558368843 | 0.7404378585871818 | T | T | T |
| 0.8372118164046863 | 0.0111299054762413 | 0.7425694139774058 | T | T | T |
| 0.1673792585691202 | 0.6789080870119958 | 0.8121755224852518 | T | T | T |
| 0.6654700027581076 | 0.6795338093326394 | 0.8121044905639101 | T | T | T |
| 0.0709372973866436 | 0.1394085776061427 | 0.1558424480077782 | T | T | T |
| 0.4029410513962648 | 0.4289787850386281 | 0.1555830591396652 | T | T | T |
| 0.0135992769289932 | 0.9775514098355998 | 0.2639130378524051 | T | T | T |
| 0.5075372050664677 | 0.9858921265141022 | 0.2620163391519843 | T | T | T |
| 0.1758884330780304 | 0.3649284584777551 | 0.2599038717225610 | T | T | T |
| 0.6748513227244461 | 0.3451773999789491 | 0.2593731111274069 | T | T | T |

|                    |                     |                    |   |   |   |
|--------------------|---------------------|--------------------|---|---|---|
| 0.3242215560355810 | 0.6838789009424229  | 0.2663566070896847 | T | T | T |
| 0.8297695440586992 | 0.6778453461480947  | 0.2597673054935959 | T | T | T |
| 0.1801894201993791 | 0.0150076176621871  | 0.3666024642256613 | T | T | T |
| 0.6822151659439517 | -0.0003521851264203 | 0.3651993493692336 | T | T | T |
| 0.3333255189000509 | 0.3196906910743872  | 0.3677171509340592 | T | T | T |
| 0.8346387549498407 | 0.3151120381949160  | 0.3643526328619187 | T | T | T |
| 0.9901720285725326 | 0.6983332629324217  | 0.3670353677863669 | T | T | T |
| 0.4904486236969359 | 0.6991177376931631  | 0.3654117116398016 | T | T | T |
| 0.0007199363588318 | 0.0351185355572017  | 0.4707130319551323 | T | T | T |
| 0.5021689350691468 | 0.0349332506405760  | 0.4709358046423604 | T | T | T |
| 0.1544891915260565 | 0.3408610570538306  | 0.4716807621931289 | T | T | T |
| 0.6554756757291615 | 0.3393646028938374  | 0.4703681528607940 | T | T | T |
| 0.3486700188045396 | 0.6474091651526366  | 0.4708566821723050 | T | T | T |
| 0.8483648251464465 | 0.6474684034783146  | 0.4709548552036214 | T | T | T |
| 0.1676600525522312 | 0.9804234256134617  | 0.5753999393958853 | T | T | T |
| 0.6691258327776575 | 0.9802214078829659  | 0.5756129853682570 | T | T | T |
| 0.3211714383622236 | 0.3679410669970999  | 0.5754765826270702 | T | T | T |
| 0.8214825309772767 | 0.3678566082424016  | 0.5753725256411669 | T | T | T |
| 0.0143712140809389 | 0.6759527411096279  | 0.5759652604375406 | T | T | T |
| 0.5153481858167880 | 0.6744810679112250  | 0.5746481354474426 | T | T | T |
| 0.9876326118005562 | 0.0156855017335675  | 0.6811263166029704 | T | T | T |
| 0.4896635799886450 | 0.0003121774325813  | 0.6797250837632439 | T | T | T |
| 0.1794069954514007 | 0.3162102061556776  | 0.6809208939504908 | T | T | T |
| 0.6796742659880532 | 0.3169862655420059  | 0.6792873410660524 | T | T | T |
| 0.3365314809158378 | 0.6956385406595847  | 0.6786137686827808 | T | T | T |
| 0.8352121006548689 | 0.7002136539166630  | 0.6819730724661780 | T | T | T |
| 0.1623338769177317 | 0.0294244375083561  | 0.7843162293463984 | T | T | T |
| 0.6562647301192214 | 0.0377427027080092  | 0.7824115807706957 | T | T | T |
| 0.3456309963586100 | 0.3314406582521596  | 0.7799713547289122 | T | T | T |
| 0.8401080996753014 | 0.3374271362637137  | 0.7865637209153138 | T | T | T |
| 0.9950004453788384 | 0.6701520634015744  | 0.7869516187449692 | T | T | T |
| 0.4939913120733474 | 0.6503715548190456  | 0.7864294968625112 | T | T | T |
| 0.2668901891140608 | 0.5864243525464093  | 0.8907526719561413 | T | T | T |
| 0.5989249933111463 | 0.8759273681422798  | 0.8904880575379586 | T | T | T |
| 0.1289445825967800 | 0.1962002000831427  | 0.1238965532408360 | T | T | T |
| 0.4260913156038157 | 0.2398635222139826  | 0.1287790393064037 | T | T | T |
| 0.2437406700553917 | 0.7757003657127437  | 0.9175136503756770 | T | T | T |
| 0.5408526345423896 | 0.8191733958354190  | 0.9224181652933278 | T | T | T |
| 0.1802312915141561 | 0.7019865436315098  | 0.1981113030006953 | T | T | T |
| 0.4896271932951523 | 0.3133594244885924  | 0.8482154558991410 | T | T | T |

**(30)Ag\_1.5**

4.69735200000000

2.0000000000000000 0.0000000000000000 0.0000000000000000

0.5000000000000000 0.8660254030004244 0.0000000000000000

0.0000000000000000 0.0000000000000000 4.3980452500000000

Al O Ag

20 36 6

Selective dynamics

Direct

|                    |                     |                    |   |   |   |
|--------------------|---------------------|--------------------|---|---|---|
| 0.3240618362856719 | 0.9878651098776203  | 0.2061787893397612 | T | T | T |
| 0.8438092688471496 | 0.0257581356577338  | 0.2096773638965364 | T | T | T |
| 0.1735965994153879 | 0.6432278492677858  | 0.2231960374750768 | T | T | T |
| 0.6554832376296802 | 0.7078336079235797  | 0.2212531839136521 | T | T | T |
| 0.0022345640230055 | 0.3358725465460806  | 0.3103945051077640 | T | T | T |
| 0.4989089830715228 | 0.3391235314771062  | 0.3103429336812500 | T | T | T |
| 0.3352947485680803 | 0.0007599085403308  | 0.3324854347891085 | T | T | T |
| 0.8331276419843228 | 0.0061717013146117  | 0.3339441541597238 | T | T | T |
| 0.1675338468959110 | 0.6696722226413462  | 0.4144231364308055 | T | T | T |
| 0.6676705432791264 | 0.6708396691225935  | 0.4145911145880966 | T | T | T |
| 0.0009325119145400 | 0.3364580639576951  | 0.4377980938938119 | T | T | T |
| 0.5010790167641844 | 0.3376124040168281  | 0.4379677628863411 | T | T | T |
| 0.3333114175613657 | 0.0065728376651502  | 0.5199107169845031 | T | T | T |
| 0.8354823381684011 | 0.0011447344155449  | 0.5184524386018697 | T | T | T |
| 0.1697032514742625 | 0.6682071886229897  | 0.5420467519032010 | T | T | T |
| 0.6663898471261562 | 0.6714070616407215  | 0.5419947944156671 | T | T | T |
| 0.0131224071076288 | 0.2995039351576679  | 0.6311516850286448 | T | T | T |
| 0.4950229393129630 | 0.3641178546220528  | 0.6291967010777134 | T | T | T |
| 0.3445666858401548 | 0.0194972596611776  | 0.6462160127078208 | T | T | T |
| 0.8248031296969732 | 0.9815181083804623  | 0.6427136215109053 | T | T | T |
| 0.0264101607815129 | 0.9196031978521618  | 0.1628783677992458 | T | T | T |
| 0.4893291420023035 | 0.9427160736106064  | 0.1604955360096459 | T | T | T |
| 0.1680238827881077 | 0.3337560007629490  | 0.1636026432413650 | T | T | T |
| 0.7270642314909566 | 0.3940478933541047  | 0.1578792216154623 | T | T | T |
| 0.3270665034433045 | 0.6504487714216634  | 0.1639093640388128 | T | T | T |
| 0.7721259943767916 | 0.8469007391649537  | 0.1524921266805341 | T | T | T |
| 0.1796050418608981 | -0.0097624119303493 | 0.2693500350645261 | T | T | T |
| 0.6785220345883819 | 0.0176867336674610  | 0.2677247275258220 | T | T | T |
| 0.3336523560697982 | 0.3022856253609502  | 0.2696350332240051 | T | T | T |
| 0.8330713940115865 | 0.3279664914773287  | 0.2695776347134572 | T | T | T |
| 0.9865704469482754 | 0.6965033201370231  | 0.2685143424660901 | T | T | T |
| 0.4898468010945746 | 0.6904693484920797  | 0.2686759185647636 | T | T | T |
| 0.0003705394550694 | 0.0309393741974066  | 0.3739706191654864 | T | T | T |
| 0.5012263300870605 | 0.0302194658651050  | 0.3737360939238155 | T | T | T |
| 0.1543685247320550 | 0.3350699827950944  | 0.3735372293420116 | T | T | T |
| 0.6536847109906553 | 0.3374705188250547  | 0.3742959094778601 | T | T | T |
| 0.3479896133831285 | 0.6430258712308364  | 0.3740607860478183 | T | T | T |
| 0.8477040803244765 | 0.6453107373602551  | 0.3741160109740102 | T | T | T |
| 0.1673742778296964 | 0.9771134041716163  | 0.4786568118215117 | T | T | T |
| 0.6682456099350702 | 0.9763640418496601  | 0.4784207929407928 | T | T | T |
| 0.3206221966934602 | 0.3642868682013782  | 0.4783322640914549 | T | T | T |
| 0.8209083709194686 | 0.3619873917255020  | 0.4782753576478971 | T | T | T |
| 0.0149266845507182 | 0.6698271030685169  | 0.4780959381587228 | T | T | T |
| 0.5142426452578907 | 0.6722305368084344  | 0.4788555351131108 | T | T | T |
| 0.9901042142228869 | -0.0103833082528395 | 0.5846632065080135 | T | T | T |
| 0.4890313530494273 | 0.0170869669355015  | 0.5830468007868573 | T | T | T |
| 0.1787762559664286 | 0.3168758490532765  | 0.5837285676309331 | T | T | T |
| 0.6820520551966160 | 0.3107915411636279  | 0.5838807711603944 | T | T | T |



|                    |                    |                    |   |   |   |
|--------------------|--------------------|--------------------|---|---|---|
| 0.3349670182463996 | 0.7050584295115596 | 0.5827583053814045 | T | T | T |
| 0.8355532305444534 | 0.6793028063955406 | 0.5828241430442069 | T | T | T |
| 0.1793118805938259 | 0.0646406901923524 | 0.6918994284167975 | T | T | T |
| 0.6422066191084633 | 0.0877603904925044 | 0.6895204038054378 | T | T | T |
| 0.3415442180537535 | 0.3569514843750078 | 0.6884823203400414 | T | T | T |
| 0.8965067703750369 | 0.1604831557258314 | 0.6998648260392911 | T | T | T |
| 0.9415752221464828 | 0.6132833445100178 | 0.6945332055737989 | T | T | T |
| 0.5006131034244684 | 0.6736033250990174 | 0.6887764984023124 | T | T | T |
| 0.9473561485504597 | 0.3814753878330822 | 0.1403514902513630 | T | T | T |
| 0.5514493519833721 | 0.2724261091748355 | 0.1403031189074404 | T | T | T |
| 0.1923862392372119 | 0.6055168699578597 | 0.0796158646784290 | T | T | T |
| 0.1171467572544185 | 0.7349945183250552 | 0.7120752612728317 | T | T | T |
| 0.7212779618528179 | 0.6258302777190488 | 0.7120612356293544 | T | T | T |
| 0.4762779827425812 | 0.4019139643925144 | 0.7727686041697156 | T | T | T |

**(Al)+Ag**

4.69735200000000

|                    |                    |                    |
|--------------------|--------------------|--------------------|
| 1.0000000000000000 | 0.0000000000000000 | 0.0000000000000000 |
| 0.5000000000000000 | 0.8660254030004244 | 0.0000000000000000 |
| 0.0000000000000000 | 0.0000000000000000 | 4.3980452500000000 |

Al O Ag

12 18 2

Selective dynamics

Direct

|                    |                     |                    |   |   |   |
|--------------------|---------------------|--------------------|---|---|---|
| 0.0159253481311181 | 0.3291824680127914  | 0.1879404899861032 | T | T | T |
| 0.6827655092150529 | 0.9957386146224485  | 0.2564359327715911 | T | T | T |
| 0.3493804772764738 | 0.6625459580392837  | 0.2713731669844011 | T | T | T |
| 0.0161256647247884 | 0.3292890593180170  | 0.3586762451922724 | T | T | T |
| 0.6828040666338858 | 0.9960055723743253  | 0.3816326590517280 | T | T | T |
| 0.3496359252058433 | 0.6626764236608864  | 0.4628864141918931 | T | T | T |
| 0.0163764321549415 | 0.3293023488354385  | 0.4862559444537073 | T | T | T |
| 0.6830796588329399 | 0.9960343006001435  | 0.5675044214973090 | T | T | T |
| 0.3498182713916562 | 0.6627085096628766  | 0.5904747495887235 | T | T | T |
| 0.0166255535350268 | 0.3293245666373320  | 0.6778181225250308 | T | T | T |
| 0.6832969894440752 | 0.9961268324349575  | 0.6927275488632724 | T | T | T |
| 0.3501530068748125 | 0.6628183956234843  | 0.7611646783709421 | T | T | T |
| 0.0276276351263102 | 0.9741328037540286  | 0.2132987540297628 | T | T | T |
| 0.3593764002806618 | 0.3406824623041055  | 0.2133502254237567 | T | T | T |
| 0.6609468164846650 | 0.6725679915154328  | 0.2133041020634390 | T | T | T |
| 0.3748466102574347 | 0.9933835912504237  | 0.3173874566537131 | T | T | T |
| 0.6801882906998696 | 0.3063162140618096  | 0.3174145217162244 | T | T | T |
| 0.9931880698036049 | 0.6880160471701698  | 0.3173987618502114 | T | T | T |
| 0.0156387372380649 | 0.0235031062276043  | 0.4222973988053245 | T | T | T |
| 0.3226912490509110 | 0.3286246312183732  | 0.4223422157549797 | T | T | T |
| 0.7104885476940263 | 0.6357451453394002  | 0.4223127675257939 | T | T | T |
| 0.3503572141152552 | 0.9684478689535004  | 0.5268500477137674 | T | T | T |
| 0.6555023684115856 | 0.3563014434022174  | 0.5268429617996321 | T | T | T |
| 0.0432774210259245 | 0.6633309552116203  | 0.5268350348097642 | T | T | T |
| 0.9910662169141786 | -0.0014238938046880 | 0.6317759249845581 | T | T | T |

|                    |                    |                    |   |   |   |
|--------------------|--------------------|--------------------|---|---|---|
| 0.3727493962647349 | 0.3038991733150319 | 0.6317598672527420 | T | T | T |
| 0.6856629236637150 | 0.6856116515099087 | 0.6317960383021749 | T | T | T |
| 0.3384899345585538 | 0.0179889852076209 | 0.7359406468157159 | T | T | T |
| 0.7051619049699156 | 0.3192699430979352 | 0.7358743937201513 | T | T | T |
| 0.0067188964065448 | 0.6511980378914457 | 0.7358217134474114 | T | T | T |
| 0.3489531931766647 | 0.6601335044374681 | 0.1193039371437007 | T | T | T |
| 0.0163098499201319 | 0.3315327631274111 | 0.8299662589503140 | T | T | T |

**(Al)OHAg**

4.69735200000000

1.0000000000000000 0.0000000000000000 0.0000000000000000

0.5000000000000000 0.8660254030004244 0.0000000000000000

0.0000000000000000 0.0000000000000000 4.3980452500000000

Al O H Ag

12 20 2 2

Selective dynamics

Direct

|                    |                    |                    |   |   |   |
|--------------------|--------------------|--------------------|---|---|---|
| 0.0432950018668876 | 0.3536439315645694 | 0.2366834048332649 | T | T | T |
| 0.7086253909081890 | 0.0250333406129428 | 0.3057712412936340 | T | T | T |
| 0.3749338935210531 | 0.6906948689671566 | 0.3208014579220659 | T | T | T |
| 0.0411994106647029 | 0.3574739437390875 | 0.4079982105298825 | T | T | T |
| 0.7077188226766040 | 0.0239994872901903 | 0.4308930467098548 | T | T | T |
| 0.3740339738954646 | 0.6909246959426056 | 0.5121574143752810 | T | T | T |
| 0.0404381710432986 | 0.3579199377044162 | 0.5355542903324420 | T | T | T |
| 0.7066912404239361 | 0.0247731885823228 | 0.6167844400402558 | T | T | T |
| 0.3733538683521260 | 0.6916096179430795 | 0.6397028445789417 | T | T | T |
| 0.0398433945380390 | 0.3580862930689932 | 0.7268553945926328 | T | T | T |
| 0.7076635822267576 | 0.0244894448117279 | 0.7419358591711998 | T | T | T |
| 0.3706584217565592 | 0.6899735482283660 | 0.8110205411676219 | T | T | T |
| 0.0116816107020128 | 0.3059888189279363 | 0.1505756600437138 | T | T | T |
| 0.0563536791305381 | 0.9993396799938594 | 0.2639438023322782 | T | T | T |
| 0.3895421778435448 | 0.3688402811774623 | 0.2603437765463923 | T | T | T |
| 0.6903554476508873 | 0.6998699672675244 | 0.2632545018067844 | T | T | T |
| 0.3999853491469096 | 0.0232998554067834 | 0.3665163796711752 | T | T | T |
| 0.7047191774426196 | 0.3351231041822587 | 0.3667012814500410 | T | T | T |
| 0.0192967066471965 | 0.7149231205155857 | 0.3668747929820526 | T | T | T |
| 0.0403162227317182 | 0.0517397216596223 | 0.4715085959384524 | T | T | T |
| 0.3474977657529621 | 0.3565298849978760 | 0.4717083091844216 | T | T | T |
| 0.7349110611505054 | 0.6641354892977276 | 0.4716069671173102 | T | T | T |
| 0.3740108691756632 | 0.9973385705569200 | 0.5761372280589256 | T | T | T |
| 0.6793879511895256 | 0.3846970732909156 | 0.5759946359801447 | T | T | T |
| 0.0671628126724855 | 0.6920643355320877 | 0.5761461450015233 | T | T | T |
| 0.0143228820347900 | 0.0280985880748261 | 0.6809985944915766 | T | T | T |
| 0.3977266005037734 | 0.3329262264611543 | 0.6811612870245156 | T | T | T |
| 0.7087956129112882 | 0.7136168690774980 | 0.6807900583950754 | T | T | T |
| 0.3640682453427573 | 0.0428683753723647 | 0.7844393446184625 | T | T | T |
| 0.7321250601557736 | 0.3437847561266025 | 0.7873167314039478 | T | T | T |
| 0.0295709266813233 | 0.6767878317882818 | 0.7837378690234473 | T | T | T |
| 0.2908566361206582 | 0.7212522223444751 | 0.8971122197623771 | T | T | T |

|                    |                    |                    |   |   |   |
|--------------------|--------------------|--------------------|---|---|---|
| 0.0904442364703257 | 0.4129197205495032 | 0.1205887516006854 | T | T | T |
| 0.4760924034563345 | 0.6431318082980013 | 0.9272019333439232 | T | T | T |
| 0.3942261870137074 | 0.7156993666463833 | 0.1714262975445209 | T | T | T |
| 0.0821836724897977 | 0.3395794648044586 | 0.8762292526448192 | T | T | T |

**(30)Zn\_1.5**

|                    |                    |                    |  |  |  |
|--------------------|--------------------|--------------------|--|--|--|
| 4.69735200000000   |                    |                    |  |  |  |
| 2.0000000000000000 | 0.0000000000000000 | 0.0000000000000000 |  |  |  |
| 0.5000000000000000 | 0.8660254030004244 | 0.0000000000000000 |  |  |  |
| 0.0000000000000000 | 0.0000000000000000 | 4.3980452500000000 |  |  |  |

Al O Zn  
20 36 6

Selective dynamics

Direct

|                     |                     |                    |   |   |   |
|---------------------|---------------------|--------------------|---|---|---|
| 0.3351578900262570  | -0.0058254334745984 | 0.2065476687386106 | T | T | T |
| 0.8330128805621285  | 0.0129215048885211  | 0.2083579442853615 | T | T | T |
| 0.1688502472278811  | 0.6639298751691444  | 0.2289847177051320 | T | T | T |
| 0.6632168101786570  | 0.6845391950658983  | 0.2168879864357659 | T | T | T |
| -0.0002540317673417 | 0.3377064545306765  | 0.3111907960216129 | T | T | T |
| 0.5019227078106894  | 0.3368891092100678  | 0.3099301822138920 | T | T | T |
| 0.3358352248173951  | 0.0015775261072491  | 0.3329676142434852 | T | T | T |
| 0.8327899281843388  | 0.0060118197760974  | 0.3329400516881870 | T | T | T |
| 0.1676678928288835  | 0.6694091623744874  | 0.4147410304634767 | T | T | T |
| 0.6676490080701273  | 0.6713418444426871  | 0.4142403912849282 | T | T | T |
| 0.0010720411756679  | 0.3359642785046049  | 0.4381377613753982 | T | T | T |
| 0.5010703395809650  | 0.3378867870230872  | 0.4376508057502040 | T | T | T |
| 0.3328690918606276  | 0.0057303691469100  | 0.5194331600177616 | T | T | T |
| 0.8359428322179034  | 0.0012340901667338  | 0.5194423719540066 | T | T | T |
| 0.1667539534850918  | 0.6703524209475976  | 0.5424621399568332 | T | T | T |
| 0.6689810270992859  | 0.6695121652934368  | 0.5411885861835490 | T | T | T |
| 0.0053498529167911  | 0.3227527339410233  | 0.6355096606157689 | T | T | T |
| 0.4997761158432928  | 0.3431719264749857  | 0.6233606579433310 | T | T | T |
| 0.3334559465834555  | 0.0130656966901098  | 0.6458720950366520 | T | T | T |
| 0.8354668446199343  | -0.0055949760004184 | 0.6440327844948180 | T | T | T |
| 0.0159684108317444  | 0.9391281009894362  | 0.1633841376135524 | T | T | T |
| 0.4972041351870570  | 0.9620740692722860  | 0.1613912283782812 | T | T | T |
| 0.1756285728398956  | 0.3302955917446625  | 0.1618508804663457 | T | T | T |
| 0.6990545495430459  | 0.3569358374893979  | 0.1616514259175121 | T | T | T |
| 0.3213999377195013  | 0.6726513370636376  | 0.1640845548391993 | T | T | T |
| 0.7988152017606625  | 0.7459990656901597  | 0.1613987507519710 | T | T | T |
| 0.1792216498650473  | 0.0031997911631218  | 0.2685752816525884 | T | T | T |
| 0.6787048965906174  | 0.0065976210098112  | 0.2691267067063928 | T | T | T |
| 0.3328777105903312  | 0.3104236137450430  | 0.2696663216426244 | T | T | T |
| 0.8368908831628088  | 0.3150027361733197  | 0.2681445700496873 | T | T | T |
| 0.9894399016656747  | 0.6932739125729908  | 0.2695737639608712 | T | T | T |
| 0.4883244503569020  | 0.6934396439064231  | 0.2681447035422729 | T | T | T |
| 0.0005079724239812  | 0.0301529165484483  | 0.3739569976096885 | T | T | T |
| 0.5007823824422688  | 0.0316780490638629  | 0.3739525410854308 | T | T | T |
| 0.1547652899389053  | 0.3345023169608702  | 0.3739573792664595 | T | T | T |

|                     |                    |                    |   |   |   |
|---------------------|--------------------|--------------------|---|---|---|
| 0.6539618272315142  | 0.3383777709165078 | 0.3738981170823413 | T | T | T |
| 0.3476130017250599  | 0.6434762731313551 | 0.3737057293061964 | T | T | T |
| 0.8481424572795189  | 0.6445088063225332 | 0.3741593482441402 | T | T | T |
| 0.1679092056424700  | 0.9756771117122622 | 0.4784582320634545 | T | T | T |
| 0.6682052640030328  | 0.9772124893661983 | 0.4784420220130774 | T | T | T |
| 0.3211192648040906  | 0.3638531342634629 | 0.4786954048127500 | T | T | T |
| 0.8205696357882653  | 0.3627975163088523 | 0.4782281415740578 | T | T | T |
| 0.0147752623800708  | 0.6689396051534361 | 0.4784698527343404 | T | T | T |
| 0.5139291181527353  | 0.6728629816055333 | 0.4784248754307822 | T | T | T |
| 0.9899445564948588  | 0.0005932579926688 | 0.5832803100617209 | T | T | T |
| 0.4894492854320540  | 0.0039119476601754 | 0.5838009152328496 | T | T | T |
| 0.1803202885008039  | 0.3138562547614567 | 0.5842608455607801 | T | T | T |
| 0.6792155593700039  | 0.3139912155051109 | 0.5828266151700837 | T | T | T |
| 0.3358014437123832  | 0.6968607284462378 | 0.5827367899545162 | T | T | T |
| 0.8318465027138650  | 0.6921752594678190 | 0.5842244494820370 | T | T | T |
| 0.1713576290366225  | 0.0451966831328046 | 0.6910055537348849 | T | T | T |
| 0.6524697869561140  | 0.0683686758802028 | 0.6889697063318334 | T | T | T |
| 0.3470553463423511  | 0.3350023606561019 | 0.6882279994825818 | T | T | T |
| 0.8697186736647810  | 0.2612297270245790 | 0.6909714471860567 | T | T | T |
| 0.9692978843746195  | 0.6504118976533849 | 0.6907759267210303 | T | T | T |
| 0.4929535720523288  | 0.6775276235067360 | 0.6907238437652645 | T | T | T |
| -0.0277575880179606 | 0.3569409047916597 | 0.1502551069436258 | T | T | T |
| 0.5296516797691625  | 0.2997479520982650 | 0.1455250673337266 | T | T | T |
| 0.1789931793771244  | 0.6388902726146599 | 0.1057151247869547 | T | T | T |
| 0.1386994438243922  | 0.7078138230515025 | 0.7068154421251415 | T | T | T |
| 0.6964706975656760  | 0.6503934313432151 | 0.7022203803958946 | T | T | T |
| 0.4893372447144294  | 0.3686937545441706 | 0.7466226866173343 | T | T | T |

**(Al)OHZn\_0.5**

4.697352000000000

2.0000000000000000 0.0000000000000000 0.0000000000000000

0.5000000000000000 0.8660254030004244 0.0000000000000000

0.0000000000000000 0.0000000000000000 4.3980452500000000

Al O H Zn

24 40 4 2

Selective dynamics

Direct

|                     |                    |                    |   |   |   |
|---------------------|--------------------|--------------------|---|---|---|
| -0.0002857223557365 | 0.3330630599892228 | 0.2352674603506802 | T | T | T |
| 0.5053408777561976  | 0.3349592825624179 | 0.2358702005408273 | T | T | T |
| 0.3375776600462381  | 0.0135450965565485 | 0.3053953299970338 | T | T | T |
| 0.8337328023856000  | 0.0034786146358525 | 0.3044419874038104 | T | T | T |
| 0.1676317444134474  | 0.6800998682935344 | 0.3255343814071773 | T | T | T |
| 0.6693773131714571  | 0.6699937135521086 | 0.3155086539767403 | T | T | T |
| 0.9990877362526087  | 0.3430829604387149 | 0.4079373315354916 | T | T | T |
| 0.5040589689404688  | 0.3401586311475061 | 0.4066469890143106 | T | T | T |
| 0.3355049022062018  | 0.0076580993048641 | 0.4307558552156782 | T | T | T |
| 0.8343799012966328  | 0.0078966131458827 | 0.4296798952179541 | T | T | T |
| 0.1680353439531544  | 0.6749598705768036 | 0.5118423029193003 | T | T | T |
| 0.6680390048549014  | 0.6742406821329658 | 0.5111873698492839 | T | T | T |

|                    |                    |                    |   |   |   |
|--------------------|--------------------|--------------------|---|---|---|
| 0.0014917795856290 | 0.3415212502561613 | 0.5351466031422270 | T | T | T |
| 0.5014541052918887 | 0.3409291357145370 | 0.5345001636734442 | T | T | T |
| 0.3340477891083405 | 0.0080559987811668 | 0.6155668377594509 | T | T | T |
| 0.8351874214413086 | 0.0078441531953561 | 0.6166487641285676 | T | T | T |
| 0.1655525067294905 | 0.6754822457683818 | 0.6397054508285878 | T | T | T |
| 0.6705524531146271 | 0.6725370734791536 | 0.6383971299886682 | T | T | T |
| 0.0004247596200017 | 0.3451781363891949 | 0.7308408408507934 | T | T | T |
| 0.5020690308663430 | 0.3354130284015928 | 0.7207987415957596 | T | T | T |
| 0.3322122732872000 | 0.0017951024716739 | 0.7409255781477827 | T | T | T |
| 0.8360848836222310 | 0.0116374463540367 | 0.7418747568897043 | T | T | T |
| 0.1645219534566649 | 0.6801402552917541 | 0.8104940265780088 | T | T | T |
| 0.6701650989976866 | 0.6819035164380305 | 0.8110098494290724 | T | T | T |
| 0.0567812922648429 | 0.1390937249769576 | 0.1552069179249841 | T | T | T |
| 0.4127556673746260 | 0.4102148966865491 | 0.1547365298066806 | T | T | T |
| 0.0134704133975875 | 0.9741761409596902 | 0.2646707685388796 | T | T | T |
| 0.5076608490096982 | 0.9855072250032176 | 0.2620861187041598 | T | T | T |
| 0.1737930382384646 | 0.3602685107260430 | 0.2573824025321061 | T | T | T |
| 0.6773141772365773 | 0.3452202945800897 | 0.2597493207035459 | T | T | T |
| 0.3262615004570631 | 0.6838234268691833 | 0.2655710685113271 | T | T | T |
| 0.8278249231424432 | 0.6809482018214837 | 0.2600222687122855 | T | T | T |
| 0.1802651990529206 | 0.0151188146949112 | 0.3662264008140487 | T | T | T |
| 0.6819350188404407 | 0.0012012885514453 | 0.3654137918233757 | T | T | T |
| 0.3327631375926398 | 0.3208343168967642 | 0.3667538594917440 | T | T | T |
| 0.8342857628069136 | 0.3162745813088089 | 0.3650574688442331 | T | T | T |
| 0.9907239719542814 | 0.6974162138177433 | 0.3669671554714200 | T | T | T |
| 0.4906649383823994 | 0.7004862358784951 | 0.3658837916086410 | T | T | T |
| 0.0009292129171134 | 0.0352354348009041 | 0.4707889604170270 | T | T | T |
| 0.5016044532973015 | 0.0361282078629087 | 0.4708434080110967 | T | T | T |
| 0.1548133606444120 | 0.3403436695572780 | 0.4715449758136155 | T | T | T |
| 0.6550694621789146 | 0.3399698797210418 | 0.4706107244440678 | T | T | T |
| 0.3482528230411492 | 0.6477285686605720 | 0.4707079193415454 | T | T | T |
| 0.8483865570712603 | 0.6479969997487881 | 0.4710603505452164 | T | T | T |
| 0.1678970243443498 | 0.9796880855671766 | 0.5755062284162455 | T | T | T |
| 0.6685942708854364 | 0.9805679210697359 | 0.5755444036096201 | T | T | T |
| 0.3212349887446043 | 0.3681045237201426 | 0.5756303438022028 | T | T | T |
| 0.8211655279424881 | 0.3677898974875197 | 0.5752734072463044 | T | T | T |
| 0.0144831799907686 | 0.6757737113372023 | 0.5757283613263168 | T | T | T |
| 0.5147382440871591 | 0.6753698642942257 | 0.5747777423621458 | T | T | T |
| 0.9877774798945067 | 0.0142589940302867 | 0.6809260318388853 | T | T | T |
| 0.4893715774459920 | 0.0005628545673686 | 0.6800650311728965 | T | T | T |
| 0.1790191189352083 | 0.3149845358426184 | 0.6804564607345199 | T | T | T |
| 0.6789892244194424 | 0.3181267142397599 | 0.6793662753871109 | T | T | T |
| 0.3369327646483034 | 0.6946574150558620 | 0.6795612748214050 | T | T | T |
| 0.8354274760042232 | 0.6991651714529591 | 0.6812780736976117 | T | T | T |
| 0.1622502955474691 | 0.0296293779534027 | 0.7842757763310289 | T | T | T |
| 0.6562377962528433 | 0.0409565455470398 | 0.7816109117539624 | T | T | T |
| 0.3435263516453776 | 0.3313696529703503 | 0.7807479797563386 | T | T | T |
| 0.8420799193485786 | 0.3339373803500921 | 0.7863012243655971 | T | T | T |
| 0.9925134059515458 | 0.6699634972688840 | 0.7865904523235643 | T | T | T |

|                    |                    |                    |   |   |   |
|--------------------|--------------------|--------------------|---|---|---|
| 0.4960482544688206 | 0.6549064999920660 | 0.7888946231812644 | T | T | T |
| 0.2573381381749362 | 0.6052037061405859 | 0.8916169444901567 | T | T | T |
| 0.6136679032138438 | 0.8752792006548910 | 0.8910528094602338 | T | T | T |
| 0.0940479174635504 | 0.2084532765532775 | 0.1176012196597660 | T | T | T |
| 0.4394763870659396 | 0.2097248365133354 | 0.1311425415035863 | T | T | T |
| 0.2312743541902187 | 0.8063491065506418 | 0.9148464714175706 | T | T | T |
| 0.5789859922162920 | 0.8037522841463886 | 0.9290864854519508 | T | T | T |
| 0.1878131621188441 | 0.6889540611067192 | 0.1936068866259376 | T | T | T |
| 0.4821041519712906 | 0.3256137597460698 | 0.8527300720417872 | T | T | T |

**(Al)+Zn**

4.69735200000000

|                    |                    |                    |
|--------------------|--------------------|--------------------|
| 1.0000000000000000 | 0.0000000000000000 | 0.0000000000000000 |
| 0.5000000000000000 | 0.8660254030004244 | 0.0000000000000000 |
| 0.0000000000000000 | 0.0000000000000000 | 4.3980452500000000 |

Al O Zn

12 18 2

Selective dynamics

Direct

|                    |                     |                    |   |   |   |
|--------------------|---------------------|--------------------|---|---|---|
| 0.0107234261823419 | 0.3332949530157026  | 0.2441230671465074 | T | T | T |
| 0.6805675747308784 | -0.0052205965335614 | 0.3071005861683018 | T | T | T |
| 0.3491417859204149 | 0.6612747770344958  | 0.3205939982630995 | T | T | T |
| 0.0162589585832703 | 0.3293599668111231  | 0.4092933454740305 | T | T | T |
| 0.6833562306019230 | -0.0041096854557232 | 0.4319248630860789 | T | T | T |
| 0.3501290453778935 | 0.6625685043473749  | 0.5131090456974852 | T | T | T |
| 0.0168942407355801 | 0.3288198092780141  | 0.5366959287564307 | T | T | T |
| 0.6835618569536883 | -0.0043994076132538 | 0.6178981397272311 | T | T | T |
| 0.3505128286184332 | 0.6622188471138362  | 0.6405231160825243 | T | T | T |
| 0.0171968501500331 | 0.3304921009174307  | 0.7291422993212805 | T | T | T |
| 0.6856712981288123 | -0.0027742057466676 | 0.7427498854008621 | T | T | T |
| 0.3556381274709681 | 0.6585581264384930  | 0.8058388694046407 | T | T | T |
| 0.0213951307454647 | 0.9700547540979837  | 0.2600901120343772 | T | T | T |
| 0.3581651865843562 | 0.3400332050410793  | 0.2656681694929310 | T | T | T |
| 0.6523723913788755 | 0.6768378860772420  | 0.2644289263414151 | T | T | T |
| 0.3718930589757729 | -0.0072624482349794 | 0.3678906611868378 | T | T | T |
| 0.6829944315581967 | 0.3045792045329309  | 0.3675147225913796 | T | T | T |
| 0.9930804807308732 | 0.6888168441544987  | 0.3676801846786065 | T | T | T |
| 0.0152963262244962 | 0.0236149657684621  | 0.4729201578486448 | T | T | T |
| 0.3232209945794128 | 0.3286641488882179  | 0.4725796612259371 | T | T | T |
| 0.7111782907574129 | 0.6354733162944443  | 0.4726238831148261 | T | T | T |
| 0.3516884118470316 | 0.9677647710724729  | 0.5769239148620863 | T | T | T |
| 0.6558614778383816 | 0.3559371053104468  | 0.5772100898865415 | T | T | T |
| 0.0437894903003053 | 0.6627250545788733  | 0.5772757394726350 | T | T | T |
| 0.9947143767889937 | -0.0011126642193379 | 0.6819463688085337 | T | T | T |
| 0.3736101828939000 | 0.3027756212812912  | 0.6821437213508783 | T | T | T |
| 0.6835410600454882 | 0.6871456683938876  | 0.6823294813686726 | T | T | T |
| 0.3447395230336617 | 0.0218794034714155  | 0.7897330978400142 | T | T | T |
| 0.7140118427283157 | 0.3152255728286692  | 0.7854454517022221 | T | T | T |
| 0.0083575876504175 | 0.6517307001297152  | 0.7840884060244492 | T | T | T |

0.1004307879567356 0.6805685808934635 0.1598447649957453 T T T  
0.2552353234110523 0.3154805950447959 0.8894327428849100 T T T

2. Structural information on (3O)/Zn, (Al)/Zn and (Al)/Cr/Zn interfaces, as obtained from VASP calculations at the LDA level, Fig. 7.

**(Al)/Zn**

1.0000000000000000  
4.7355004340000004 0.0000000000000000 0.0000000000000000  
-2.3677502170000002 4.1010636749999998 0.0000000000000000  
0.0000000000000000 0.0000000000000000 35.6763996398312244

Al O Zn  
14 21 27

**Direct**

-0.0000000000000000 0.0000000000000000 0.1025056438708051  
-0.0000000000000000 0.0000000000000000 0.8974943561291949  
-0.0000000000000000 -0.0000000000000000 0.1965083039485343  
-0.0000000000000000 -0.0000000000000000 0.8034916960514585  
-0.0000000000000000 -0.0000000000000000 0.0322209196735358  
-0.0000000000000000 -0.0000000000000000 0.9677790803264642  
0.6666669999999998 0.3333330000000032 0.1525782074067263  
0.6666669999999998 0.3333330000000032 0.8474217925932737  
0.6666669999999998 0.3333330000000032 0.0360390952771480  
0.6666669999999998 0.3333330000000032 0.9639609047228520  
0.3333330000000032 0.6666669999999998 0.0870753203797199  
0.3333330000000032 0.6666669999999998 0.9129246796202800  
0.3333330000000032 0.6666669999999998 0.1598982403511551  
0.3333330000000032 0.6666669999999998 0.8401017596488448  
0.3115250221626902 0.0017419533762413 0.0642662438302076  
0.3115250221626902 0.0017419533762413 0.9357337561697853  
0.9982580466237587 0.3097830687864417 0.0642662438302076  
0.9982580466237587 0.3097830687864417 0.9357337561697853  
0.6902169312135582 0.6884749778373027 0.0642662438302076  
0.6902169312135582 0.6884749778373027 0.9357337561697853  
0.9904307632361166 0.3475151132786166 0.1850933759262580  
0.9904307632361166 0.3475151132786166 0.8149066240737491  
0.3382083912167192 0.2709660464124886 0.0000000000000000  
0.6524848867213835 0.6429146499574956 0.1850933759262580  
0.6524848867213835 0.6429146499574956 0.8149066240737491  
0.7290339535875113 0.0672413448042260 0.0000000000000000  
0.3570853500425045 0.0095692367638834 0.1850933759262580

|                     |                    |                    |
|---------------------|--------------------|--------------------|
| 0.3570853500425045  | 0.0095692367638834 | 0.8149066240737491 |
| 0.9327586551957741  | 0.6617916087832807 | 0.0000000000000000 |
| 0.0229825033742963  | 0.6647550134832122 | 0.1252471734428900 |
| 0.0229825033742963  | 0.6647550134832122 | 0.8747528265571100 |
| 0.3352449865167877  | 0.3582284898910744 | 0.1252471734428900 |
| 0.3352449865167877  | 0.3582284898910744 | 0.8747528265571100 |
| 0.6417715101089255  | 0.9770174966257038 | 0.1252471734428900 |
| 0.6417715101089255  | 0.9770174966257038 | 0.8747528265571100 |
| 0.9991917583536107  | 0.3438853601395148 | 0.2575218108880327 |
| 0.6561146398604852  | 0.6553063982141101 | 0.2575218108880327 |
| 0.3446936017858970  | 0.0008082416463893 | 0.2575218108880327 |
| 0.3333333333333357  | 0.6666666666666643 | 0.3195121063645024 |
| -0.0000000000000000 | 0.0000000000000000 | 0.3213109028741292 |
| 0.6666666666666643  | 0.3333333333333357 | 0.3193942356748009 |
| 0.9999716865473307  | 0.3347616591983901 | 0.3805578674608269 |
| 0.6652383408016099  | 0.6652100273489477 | 0.3805578674608269 |
| 0.3347899726510522  | 0.0000283134526693 | 0.3805578674608269 |
| 0.3333333333333357  | 0.6666666666666643 | 0.4403109960533311 |
| -0.0000000000000000 | 0.0000000000000000 | 0.4405408885082351 |
| 0.6666666666666643  | 0.3333333333333357 | 0.4402927774509034 |
| 0.0000435912103772  | 0.3334376805220871 | 0.5000000000000000 |
| 0.6665623194779130  | 0.6666059106882831 | 0.5000000000000000 |
| 0.3333940893117169  | 0.9999564087896228 | 0.5000000000000000 |
| 0.3333333333333357  | 0.6666666666666643 | 0.5596890039466688 |
| -0.0000000000000000 | 0.0000000000000000 | 0.5594591114917649 |
| 0.6666666666666643  | 0.3333333333333357 | 0.5597072225490967 |
| 0.9999716865473307  | 0.3347616591983901 | 0.6194421325391731 |
| 0.6652383408016099  | 0.6652100273489477 | 0.6194421325391731 |
| 0.3347899726510522  | 0.0000283134526693 | 0.6194421325391731 |
| 0.3333333333333357  | 0.6666666666666643 | 0.6804878936354977 |
| -0.0000000000000000 | 0.0000000000000000 | 0.6786890971258709 |
| 0.6666666666666643  | 0.3333333333333357 | 0.6806057643251990 |
| 0.9991917583536107  | 0.3438853601395148 | 0.7424781891119672 |
| 0.6561146398604852  | 0.6553063982141101 | 0.7424781891119672 |
| 0.3446936017858970  | 0.0008082416463893 | 0.7424781891119672 |

**(3O)/Zn**

|                     |                    |                     |
|---------------------|--------------------|---------------------|
| 1.0000000000000000  |                    |                     |
| 4.7355004340000004  | 0.0000000000000000 | 0.0000000000000000  |
| -2.3677502170000002 | 4.1010636749999998 | 0.0000000000000000  |
| 0.0000000000000000  | 0.0000000000000000 | 32.8785631314693276 |

Al O Zn  
12 21 27

**Direct**

|                     |                     |                    |
|---------------------|---------------------|--------------------|
| -0.0000000000000000 | -0.0000000000000000 | 0.1118141833253549 |
| -0.0000000000000000 | -0.0000000000000000 | 0.8881858166746451 |
| -0.0000000000000000 | -0.0000000000000000 | 0.0350198526094203 |
| -0.0000000000000000 | -0.0000000000000000 | 0.9649801473905797 |
| 0.6666669999999998  | 0.3333330000000003  | 0.1646119797038546 |



0.6666669999999968 0.3333330000000032 0.8353880202961527  
0.6666669999999968 0.3333330000000032 0.0390252083964011  
0.6666669999999968 0.3333330000000032 0.9609747916035989  
0.3333330000000032 0.6666669999999968 0.0938404279625205  
0.3333330000000032 0.6666669999999968 0.9061595720374795  
0.3333330000000032 0.6666669999999968 0.1723040498630998  
0.3333330000000032 0.6666669999999968 0.8276959501369001  
0.3118532400346448 0.0022264585033828 0.0696508783324429  
0.3118532400346448 0.0022264585033828 0.9303491216675572  
0.9977735414966173 0.3096267815312692 0.0696508783324429  
0.9977735414966173 0.3096267815312692 0.9303491216675572  
0.6903732184687308 0.6881467599653551 0.0696508783324429  
0.6903732184687308 0.6881467599653551 0.9303491216675572  
0.9923513259804883 0.3632854294263718 0.2023398259590634  
0.9923513259804883 0.3632854294263718 0.7976601740409366  
0.3380733059593085 0.2712005499003475 -0.0000000000000000  
0.6367145705736281 0.6290648965541332 0.2023398259590634  
0.6367145705736281 0.6290648965541332 0.7976601740409366  
0.7287994500996525 0.0668717560589563 -0.0000000000000000  
0.3709351034458667 0.0076486740195116 0.2023398259590634  
0.3709351034458667 0.0076486740195116 0.7976601740409366  
0.9331282439410438 0.6619266940406916 -0.0000000000000000  
0.0230915299368153 0.6645939506372853 0.1357432116303115  
0.0230915299368153 0.6645939506372853 0.8642567883696886  
0.3354060493627146 0.3584985792995345 0.1357432116303115  
0.3354060493627146 0.3584985792995345 0.8642567883696886  
0.6415014207004656 0.9769084700631776 0.1357432116303115  
0.6415014207004656 0.9769084700631776 0.8642567883696886  
-0.0000000000000000 -0.0000000000000000 0.2292474658605163  
0.6666666666666643 0.3333333333333357 0.2485974654537722  
0.3333333333333357 0.6666666666666643 0.2530531708530087  
0.3236588174172025 0.3106799775605179 0.3086592846086904  
0.9870211601433154 0.6763411825827975 0.3086592846086904  
0.6893200224394820 0.0129788398566917 0.3086592846086904  
-0.0000000000000000 -0.0000000000000000 0.3725254410361252  
0.6666666666666643 0.3333333333333357 0.3724669587880620  
0.3333333333333357 0.6666666666666643 0.3714238867727209  
0.3338022183645797 0.3344350170483856 0.4360208743190439  
0.0006327986837987 0.6661977816354203 0.4360208743190439  
0.6655649829516144 0.9993672013162013 0.4360208743190439  
-0.0000000000000000 -0.0000000000000000 0.5000000000000000  
0.6666666666666643 0.3333333333333357 0.5000000000000000  
0.3333333333333357 0.6666666666666643 0.5000000000000000  
0.3338022183645797 0.3344350170483856 0.5639791256809560  
0.0006327986837987 0.6661977816354203 0.5639791256809560  
0.6655649829516144 0.9993672013162013 0.5639791256809560  
-0.0000000000000000 -0.0000000000000000 0.6274745589638748  
0.6666666666666643 0.3333333333333357 0.6275330412119380  
0.3333333333333357 0.6666666666666643 0.6285761132272790

0.3236588174172025 0.3106799775605179 0.6913407153913096  
0.9870211601433154 0.6763411825827975 0.6913407153913096  
0.6893200224394820 0.0129788398566917 0.6913407153913096  
-0.0000000000000000 -0.0000000000000000 0.7707525341394839  
0.6666666666666643 0.3333333333333357 0.7514025345462277  
0.3333333333333357 0.6666666666666643 0.7469468291469913

**(Al)/Cr/Zn**

1.0000000000000000  
4.7355004340000004 0.0000000000000000 0.0000000000000000  
-2.3677502170000002 4.1010636749999998 0.0000000000000000  
0.0000000000000000 0.0000000000000000 32.9424800794594930

Al O Zn Cr  
14 21 9 18

**Direct**

0.0000000000000000 0.0000000000000000 0.1112430161287989  
0.0000000000000000 0.0000000000000000 0.8887569838712012  
0.0000000000000000 0.0000000000000000 0.2226179426728740  
0.0000000000000000 0.0000000000000000 0.7773820573271258  
0.0000000000000000 0.0000000000000000 0.0349217642570976  
0.0000000000000000 0.0000000000000000 0.9650782357429023  
0.6666669999999968 0.3333330000000032 0.1631332380992238  
0.6666669999999968 0.3333330000000032 0.8368667619007765  
0.6666669999999968 0.3333330000000032 0.0389540593113093  
0.6666669999999968 0.3333330000000032 0.9610459406886906  
0.3333330000000032 0.6666669999999968 0.0941286165164296  
0.3333330000000032 0.6666669999999968 0.9058713834835705  
0.3333330000000032 0.6666669999999968 0.1734530019043637  
0.3333330000000032 0.6666669999999968 0.8265469980956361  
0.3118935867211865 0.0023514428058926 0.0695581403228081  
0.3118935867211865 0.0023514428058926 0.9304418596771918  
0.9976485571941144 0.3095421439152938 0.0695581403228081  
0.9976485571941144 0.3095421439152938 0.9304418596771918  
0.6904578560847061 0.6881064132788206 0.0695581403228081  
0.6904578560847061 0.6881064132788206 0.9304418596771918  
0.9811814429613817 0.3440026520504003 0.2009002899623672  
0.9811814429613817 0.3440026520504003 0.7990997100376331  
0.3380670187909905 0.2712655487324217 -0.0000000000000000  
0.6559973479495997 0.6371777909109908 0.2009002899623672  
0.6559973479495997 0.6371777909109908 0.7990997100376331  
0.7287344512675781 0.0668004700585643 -0.0000000000000000  
0.3628222090890091 0.0188185570386185 0.2009002899623672  
0.3628222090890091 0.0188185570386185 0.7990997100376331  
0.9331995299414356 0.6619329812090098 -0.0000000000000000  
0.0256461673896825 0.6660693020813052 0.1354483520890174  
0.0256461673896825 0.6660693020813052 0.8645516479109826  
0.3339306979186948 0.3595778653083747 0.1354483520890174  
0.3339306979186948 0.3595778653083747 0.8645516479109826  
0.6404221346916249 0.9743538326103176 0.1354483520890174

0.6404221346916249 0.9743538326103176 0.8645516479109826  
0.3166705540381304 0.3164825285496748 0.4347771867259734  
0.9998119745115372 0.6833294459618695 0.4347771867259734  
0.6835174714503324 0.0001880254884627 0.4347771867259734  
0.0000000000000000 0.0000000000000000 0.5000000000000000  
0.6666666666666643 0.3333333333333357 0.5000000000000000  
0.3333333333333357 0.6666666666666643 0.5000000000000000  
0.3166705540381304 0.3164825285496748 0.5652228132740197  
0.9998119745115372 0.6833294459618695 0.5652228132740197  
0.6835174714503324 0.0001880254884627 0.5652228132740197  
0.0000000000000000 0.0000000000000000 0.2955685924574072  
0.6666666666666643 0.3333333333333357 0.2506682412179024  
0.3333333333333357 0.6666666666666643 0.2652377522166354  
0.5033943419548251 0.5010120573992701 0.3191346505025861  
0.9976177154444592 0.4966056580451746 0.3191346505025861  
0.4989879426007225 0.0023822845555408 0.3191346505025861  
0.0000000000000000 0.0000000000000000 0.3595009534440053  
0.6666666666666643 0.3333333333333357 0.3756418263285619  
0.3333333333333357 0.6666666666666643 0.3762218863000861  
0.0000000000000000 0.0000000000000000 0.6404990465559947  
0.6666666666666643 0.3333333333333357 0.6243581736714380  
0.3333333333333357 0.6666666666666643 0.6237781136999141  
0.5033943419548251 0.5010120573992701 0.6808653494974209  
0.9976177154444592 0.4966056580451746 0.6808653494974209  
0.4989879426007225 0.0023822845555408 0.6808653494974209  
0.0000000000000000 0.0000000000000000 0.7044314075425855  
0.6666666666666643 0.3333333333333357 0.7493317587820979  
0.3333333333333357 0.6666666666666643 0.7347622477833646
